# Supplementary material for: Antimicrobial activity of Andrographis paniculata intimate wash and commercial formulations against vaginal pathogens using the broth microdilution method
Source: PeerJ. 2025 Oct 10;13:e20144. doi: 10.7717/peerj.20144 (PMC12517284; doi:10.7717/peerj.20144)
Supplement: Supplemental Information 1 [file peerj-13-20144-s001.xlsx]

## Sheet: Candida albicans
A. PANICULATA
	3.125	1.563	0.781	0.391	0.195	0.098	0.049	0.024	0.012	0.006	0.003	0.0015
AP	0.119	0.071	0.14	0.177	0.134	0.116	0.098	0.087	0.058	0.229	0.197	0.124
AP	0.308	0.098	0.045	0.049	0.113	0.053	0.051	0.054	0.087	0.104	0.051	0.048
AP	0.143	0.042	0.081	0.069	0.115	0.057	0.052	0.078	0.072	0.163	0.16	0.06
NC	0.56	0.08	0.383	0.525	0.684	0.274	0.356	0.203	0.263	0.074	0.176	0.144
NC	0.197	0.079	0.586	0.112	0.32	0.206	0.118	0.171	0.251	0.387	0.425	0.344
MEAN	0.197	0.08	0.383	0.112	0.32	0.206	0.118	0.171	0.251	0.231	0.176	0.144
VC	0.345	0.366	0.39	0.428	0.376	0.408
MEAN	0.386
SC	0.046	0.05	0.048	0.05	0.045	0.047
MEAN	0.048
AP: A. paniculata intimate wash, NC: Negative control, VC: Viability control, SC: Sterility control
SEBAMED FEMININE WASH
TRIPLICATE	3.125	1.563	0.781	0.391	0.195	0.098	0.049	0.024	0.012	0.006	0.003	0.0015
A	0.198	0.116	0.104	0.176	0.323	0.33	0.328	0.313	0.334	0.39	0.311	0.326
B	0.166	0.188	0.152	0.223	0.273	0.286	0.286	0.282	0.305	0.283	0.295	0.338
C	0.164	0.178	0.16	0.207	0.408	0.274	0.3	0.295	0.295	0.3	0.281	0.307
NC	0.039	0.039	0.039	0.04	0.039	0.038	0.038	0.04	0.041	0.04	0.039	0.039
NC	0.04	0.04	0.039	0.038	0.038	0.038	0.04	0.039	0.038	0.039	0.038	0.039
MEAN	0.0395	0.0395	0.039	0.039	0.0385	0.038	0.039	0.0395	0.0395	0.0395	0.0385	0.039
VC	0.286	0.357	0.313	0.33	0.338	0.396
MEAN	0.336667
SC	0.055	0.056	0.054	0.057	0.057	0.057
MEAN	0.056
A,B,C: SebaMed intimate wash, NC: Negative control, VC: Viability control, SC: Sterility control
SUMBER AYU
TRIPLICATE	3.125	1.563	0.781	0.391	0.195	0.098	0.049	0.024	0.012	0.006	0.003	0.0015
A	0.202	0.271	0.273	0.289	0.308	0.372	0.344	0.258	0.342	0.248	0.26	0.24
B	0.201	0.264	0.265	0.279	0.285	0.283	0.311	0.311	0.269	0.28	0.289	0.255
C	0.202	0.264	0.261	0.3	0.295	0.299	0.312	0.326	0.307	0.29	0.288	0.273
NC	0.04	0.04	0.039	0.039	0.038	0.038	0.037	0.039	0.038	0.039	0.039	0.039
NC	0.038	0.039	0.039	0.039	0.038	0.038	0.038	0.04	0.039	0.038	0.038	0.039
MEAN	0.039	0.0395	0.039	0.039	0.038	0.038	0.0375	0.0395	0.0385	0.0385	0.0385	0.039
VC	0.246	0.353	0.383	0.346	0.354	0.319
MEAN	0.3335
SC	0.053	0.053	0.055	0.055	0.052	0.052
MEAN	0.0533333
A,B,C: Sumber Ayu intimate wash, NC: Negative control, VC: Viability control, SC: Sterility control
LACTACYD
TRIPLICATE	3.125	1.563	0.781	0.391	0.195	0.098	0.049	0.024	0.012	0.006	0.003	0.0015
A	0.177	0.241	0.258	0.329	0.344	0.359	0.347	0.308	0.294	0.281	0.29	0.295
B	0.165	0.231	0.282	0.276	0.31	0.323	0.305	0.324	0.32	0.302	0.304	0.301
C	0.195	0.247	0.314	0.32	0.287	0.364	0.339	0.336	0.301	0.336	0.296	0.308
NC	0.042	0.041	0.041	0.04	0.04	0.039	0.039	0.038	0.04	0.039	0.04	0.04
NC	0.04	0.04	0.04	0.041	0.04	0.039	0.039	0.039	0.04	0.039	0.039	0.04
MEAN	0.041	0.0405	0.0405	0.0405	0.04	0.039	0.039	0.0385	0.04	0.039	0.0395	0.04
VC	0.305	0.311	0.352	0.347	0.368
MEAN	0.3366
SC	0.048	0.05	0.05	0.061	0.057	0.049
MEAN	0.0525
A,B,C: Lactacyd intimate wash, NC: Negative control, VC: Viability control, SC: Sterility control
GOOD VIRTUES & CO.
TRIPLICATE	3.125	1.563	0.781	0.391	0.195	0.098	0.049	0.024	0.012	0.006	0.003	0.0015
A	0.099	0.062	0.134	0.303	0.371	0.371	0.457	0.392	0.431	0.352	0.348	0.426
B	0.123	0.163	0.267	0.252	0.276	0.295	0.34	0.315	0.318	0.352	0.351	0.318
C	0.102	0.197	0.274	0.283	0.282	0.316	0.293	0.299	0.324	0.358	0.35	0.349
NC	0.041	0.044	0.047	0.041	0.042	0.04	0.04	0.04	0.04	0.041	0.042	0.041
NC	0.042	0.041	0.041	0.041	0.041	0.041	0.041	0.04	0.041	0.042	0.041	0.04
MEAN	0.0415	0.0425	0.044	0.041	0.0415	0.0405	0.0405	0.04	0.0405	0.0415	0.0415	0.0405
VC	0.411	0.357	0.372	0.419	0.463	0.418
MEAN	0.406667
SC	0.048	0.05	0.052	0.053	0.052	0.48
MEAN	0.051
A,B,C: Good Virtues & Co. intimate wash, NC: Negative control, VC: Viability control, SC: Sterility control

## Sheet: Escherichia coli
A. PANICULATA
	3.125	1.563	0.781	0.391	0.195	0.098	0.049	0.024	0.012	0.006	0.003	0.0015
AP	0.192	0.824	0.795	0.89	0.85	0.471	0.111	0.1	0.095	0.663	0.481	0.838
AP	0.218	0.789	0.086	0.229	0.103	0.097	0.126	0.089	0.216	0.501	0.936	0.952
AP	0.162	0.322	0.238	0.088	0.088	0.086	0.086	0.089	0.079	0.086	0.148	0.689
NC	0.092	0.124	0.206	0.127	0.282	0.138	0.137	0.079	0.193	0.085	0.163	0.106
NC	0.096	0.115	0.133	0.159	0.072	0.087	0.181	0.148	0.08	0.108	0.278	0.091
MEAN	0.094	0.12	0.17	0.143	0.177	0.113	0.159	0.114	0.137	0.097	0.221	0.099
VC	1.14	1.183	1.303	1.276	1.226	1.151
MEAN	1.213
SC	1.231	0.066	0.067	0.074	0.065	0.068
MEAN	0.068
AP: A. paniculata intimate wash, NC: Negative control, VC: Viability control, SC: Sterility control
SEBAMED
TRIPLICATE	3.125	1.563	0.781	0.391	0.195	0.098	0.049	0.024	0.012	0.006	0.003	0.0015
A	0.471	0.58	0.736	0.756	0.827	0.884	0.87	0.922	0.955	0.953	0.891	0.948
B	0.474	0.644	0.755	0.797	0.885	0.868	0.898	0.866	0.854	0.87	0.962	0.943
C	0.501	0.687	0.774	0.859	0.979	1.014	1.013	0.993	0.958	0.939	1.021	0.954
NC	0.042	0.51	0.041	0.04	0.04	0.04	0.47	0.04	0.039	0.04	0.042	0.042
NC	0.041	0.04	0.04	0.04	0.042	0.042	0.041	0.04	0.501	0.04	0.041	0.04
MEAN	0.0415	0.04	0.0405	0.04	0.041	0.041	0.041	0.04	0.039	0.04	0.0415	0.041
VC	0.945	0.987	0.954	0.958	1.019	1.02
MEAN	0.9805
SC	0.058	0.07	0.059	0.047	0.046	0.048
MEAN	0.0546667
A,B,C: SebaMed intimate wash, NC: Negative control, VC: Viability control, SC: Sterility control
SUMBER AYU
TRIPLICATE	3.125	1.563	0.781	0.391	0.195	0.098	0.049	0.024	0.012	0.006	0.003	0.0015
A	0.548	0.74	0.852	0.895	0.86	0.881	0.938	0.959	0.906	0.924	0.9	0.94
B	0.53	0.711	0.839	0.826	0.931	0.87	0.94	0.928	0.858	0.854	0.89	0.927
C	0.535	0.738	0.908	0.909	0.928	0.943	0.93	0.963	0.924	0.902	0.964	1.017
NC	0.04	0.04	0.04	0.04	0.04	0.039	0.039	0.039	0.04	0.515	0.041	0.04
NC	0.461	0.475	0.041	0.039	0.039	0.512	0.04	0.519	0.55	0.522	0.039	0.04
MEAN	0.04	0.04	0.0405	0.0395	0.0395	0.039	0.0395	0.039	0.04	NOT VALID	0.04	0.04
VC	0.915	0.925	0.906	0.906	0.95	0.96
MEAN	0.927
SC	0.045	0.045	0.045	0.045	0.044	0.818
MEAN	0.0448
A,B,C: Sumber Ayu intimate wash, NC: Negative control, VC: Viability control, SC: Sterility control
LACTACYD
TRIPLICATE	3.125	1.563	0.781	0.391	0.195	0.098	0.049	0.024	0.012	0.006	0.003	0.0015
A	0.569	0.714	0.75	0.893	0.902	0.903	0.779	0.978	0.959	0.962	0.978	0.99
B	0.552	0.795	0.904	0.886	0.944	0.945	0.949	0.949	1.002	1.012	0.968	0.993
C	0.551	0.794	0.952	0.961	1	0.983	1.021	0.974	1.054	1.012	1.055	1.027
NC	0.042	0.043	0.043	0.501	0.044	0.042	0.043	0.046	0.044	0.047	0.044	0.043
NC	0.043	0.044	0.044	0.042	0.042	0.042	0.044	0.046	0.043	0.043	0.043	0.577
MEAN	0.0425	0.0435	0.0435	0.042	0.043	0.042	0.0435	0.046	0.0435	0.045	0.0435	0.043
VC	0.846	0.948	0.976	1.015	1.001	1.04
MEAN	0.971
SC	0.047	0.047	0.046	0.048	0.046	0.048
MEAN	0.047
A,B,C: Lactacyd intimate wash, NC: Negative control, VC: Viability control, SC: Sterility control
GOOD VIRTUES & CO.
TRIPLICATE	3.125	1.563	0.781	0.391	0.195	0.098	0.049	0.024	0.012	0.006	0.003	0.0015
A	0.6	0.729	0.794	0.831	0.882	0.865	0.913	0.963	0.961	1.02	0.926	0.875
B	0.582	0.719	0.916	0.962	0.99	0.984	0.988	0.961	0.993	0.953	0.97	0.963
C	0.602	0.745	0.966	1.003	1.01	1.034	1.06	1.039	1.056	1.042	1.076	1.043
A	0.042	0.041	0.043	0.043	0.043	0.518	0.041	0.648	0.042	0.042	0.041	0.041
B	0.042	0.456	0.044	0.042	0.043	0.042	0.043	0.042	0.042	0.044	0.041	0.043
MEAN	0.042	0.041	0.0435	0.0425	0.043	0.042	0.042	0.042	0.042	0.043	0.041	0.042
VC	0.811	0.961	0.995	1.057	1.057	1.099
MEAN	0.996667
SC	0.047	0.047	0.047	0.046	0.046	0.046
MEAN	0.0465
A,B,C: Good Virtues & Co. intimate wash, NC: Negative control, VC: Viability control, SC: Sterility control

## Sheet: GBS
A. PANICULATA
	3.125	1.563	0.781	0.391	0.195	0.098	0.049	0.024	0.012	0.006	0.003	0.0015
AP	0.087	0.085	0.09	0.085	0.084	0.083	0.085	0.08	0.087	0.097	0.083	0.084
AP	0.142	0.089	0.086	0.074	0.079	0.079	0.076	0.078	0.095	0.09	0.084	0.08
AP	0.226	0.074	0.08	0.074	0.079	0.07	0.073	0.083	0.102	0.088	0.1	0.086
NC	0.198	0.163	0.153	0.129	0.126	0.088	0.081	0.093	0.109	0.154	0.124	0.133
NC	0.09	0.123	0.135	0.22	0.109	0.203	0.113	0.161	0.143	0.086	0.208	0.169
MEAN	0.144	0.143	0.144	0.175	0.118	0.146	0.097	0.127	0.126	0.12	0.166	0.151
VC	0.33	0.304	0.303	0.305	0.306	0.304
MEAN	0.309
SC	0.064	0.322	0.071	0.069	0.063	0.066
MEAN	0.067
AP: A. paniculata intimate wash, NC: Negative control, VC: Viability control, SC: Sterility control
SEBAMED
TRIPLICATE	3.125	1.563	0.781	0.391	0.195	0.098	0.049	0.024	0.012	0.006	0.003	0.0015
A	0.055	0.061	0.265	0.283	0.307	0.307	0.308	0.318	0.311	0.33	0.314	0.338
B	0.051	0.056	0.245	0.279	0.314	0.328	0.312	0.323	0.319	0.321	0.326	0.327
C	0.048	0.059	0.237	0.244	0.314	0.316	0.331	0.332	0.325	0.336	0.307	0.347
NC	0.044	0.044	0.044	0.044	0.044	0.045	0.045	0.043	0.043	0.043	0.044	0.044
NC	0.043	0.043	0.044	0.044	0.043	0.044	0.044	0.043	0.043	0.043	0.043	0.044
MEAN	0.0435	0.0435	0.044	0.044	0.0435	0.0445	0.0445	0.043	0.043	0.043	0.0435	0.044
VC	0.374	0.347	0.33	0.332	0.33	0.317
MEAN	0.338333
SC	0.046	0.049	0.047	0.046	0.048	0.31
MEAN	0.0472
A,B,C: SebaMed intimate wash, NC: Negative control, VC: Viability control, SC: Sterility control
SUMBER AYU
TRIPLICATE	3.125	1.563	0.781	0.391	0.195	0.098	0.049	0.024	0.012	0.006	0.003	0.0015
A	0.126	0.38	0.441	0.5	0.506	0.503	0.532	0.522	0.536	0.531	0.535	0.542
B	0.112	0.346	0.413	0.48	0.515	0.53	0.541	0.526	0.52	0.513	0.509	0.525
C	0.121	0.368	0.396	0.473	0.461	0.518	0.523	0.532	0.521	0.54	0.51	0.575
NC	0.072	0.074	0.072	0.073	0.074	0.074	0.072	0.074	0.07	0.075	0.072	0.072
NC	0.072	0.071	0.073	0.072	0.07	0.072	0.071	0.073	0.071	0.071	0.072	0.073
MEAN	0.072	0.0725	0.0725	0.0725	0.072	0.073	0.0715	0.0735	0.0705	0.073	0.072	0.0725
VC	0.534	0.524	0.539	0.525	0.537	0.529
MEAN	0.531333
SC	0.048	0.05	0.052	0.053	0.052	0.05
MEAN	0.0508333
A,B,C: Sumber Ayu intimate wash, NC: Negative control, VC: Viability control, SC: Sterility control
LACTACYD
TRIPLICATE	3.125	1.563	0.781	0.391	0.195	0.098	0.049	0.024	0.012	0.006	0.003	0.0015
A	0.095	0.121	0.42	0.475	0.479	0.508	0.537	0.553	0.525	0.52	0.56	0.541
B	0.095	0.119	0.386	0.468	0.489	0.516	0.549	0.573	0.552	0.536	0.517	0.5
C	0.093	0.164	0.38	0.435	0.499	0.544	0.536	0.555	0.548	0.532	0.543	0.52
NC	0.076	0.078	0.078	0.076	0.078	0.079	0.077	0.078	0.077	0.076	0.081	0.081
NC	0.075	0.083	0.078	0.077	0.078	0.076	0.079	0.077	0.079	0.08	0.078	0.078
MEAN	0.0755	0.0805	0.078	0.0765	0.078	0.0775	0.078	0.0775	0.078	0.078	0.0795	0.0795
VC	0.551	0.519	0.528	0.52	0.534	0.65
MEAN	0.5304
SC	0.045	0.045	0.045	0.045	0.044	0.044
MEAN	0.0446667
A,B,C: Lactacyd intimate wash, NC: Negative control, VC: Viability control, SC: Sterility control
GOOD VIRTUES & CO.
TRIPLICATE	3.125	1.563	0.781	0.391	0.195	0.098	0.049	0.024	0.012	0.006	0.003	0.0015
A	0.101	0.374	0.41	0.484	0.52	0.517	0.467	0.524	0.552	0.54	0.565	0.549
B	0.197	0.477	0.421	0.475	0.507	0.516	0.51	0.523	0.524	0.528	0.505	0.507
C	0.103	0.416	0.393	0.437	0.489	0.528	0.511	0.543	0.545	0.529	0.484	0.541
NC	0.075	0.077	0.075	0.075	0.075	0.076	0.077	0.075	0.075	0.075	0.076	0.075
NC	0.075	0.075	0.076	0.076	0.073	0.074	0.073	0.073	0.074	0.074	0.075	0.074
MEAN	0.075	0.076	0.0755	0.0755	0.074	0.075	0.075	0.074	0.0745	0.0745	0.0755	0.0745
VC	0.545	0.534	0.538	0.544	0.543	0.527
MEAN	0.5385
SC	0.058	0.07	0.059	0.047	0.046	0.048
MEAN	0.0546667
A,B,C: Good Virtues & Co. intimate wash, NC: Negative control, VC: Viability control, SC: Sterility control

## Sheet: Lactobacillus
A. PANICULATA
	3.125	1.563	0.781	0.391	0.195	0.098	0.049	0.024	0.012	0.006	0.003	0.0015
AP	0.132	0.077	0.08	0.089	0.073	0.076	0.074	0.072	0.073	0.073	0.099	0.112
AP	0.084	0.065	0.065	0.072	0.073	0.075	0.07	0.092	0.101	0.104	0.101	0.098
NC	0.045	0.069	0.101	0.1	0.074	0.071	0.057	0.092	0.077	0.145	0.092	0.164
NC	0.091	0.131	0.096	0.067	0.08	0.093	0.091	0.117	0.062	0.056	0.142	0.109
MEAN	0.068	0.069	0.096	0.067	0.074	0.071	0.057	0.092	0.062	0.1	0.092	0.109
VC	0.092	0.094	0.089	0.094	0.092	0.094
MEAN	0.093
SC	0.056	0.068	0.067	0.069	0.068	0.066
MEAN	0.066
AP: A. paniculata intimate wash, NC: Negative control, VC: Viability control, SC: Sterility control
SEBAMED
TRIPLICATE	3.125	1.563	0.781	0.391	0.195	0.098	0.049	0.024	0.012	0.006	0.003	0.0015
A	0.066	0.066	0.071	0.073	0.074	0.071	0.071	0.071	0.069	0.0284	0.067	0.071
B	0.063	0.065	0.071	0.07	0.077	0.079	0.072	0.074	0.074	0.073	0.07	0.065
C	0.063	0.066	0.07	0.074	0.075	0.076	0.082	0.081	0.085	0.083	0.076	0.077
NC	0.044	0.045	0.045	0.043	0.045	0.042	0.043	0.044	0.043	0.044	0.044	0.043
NC	0.044	0.043	0.045	0.045	0.042	0.043	0.043	0.044	0.043	0.044	0.042	0.043
MEAN	0.044	0.044	0.045	0.044	0.0435	0.0425	0.043	0.044	0.043	0.044	0.043	0.043
VC	0.084	0.085	0.088	0.082	0.084	0.088
MEAN	0.0851667
SC	0.067	0.067	0.064	0.06	0.061	0.065
MEAN	0.064
A,B,C: SebaMed intimate wash, NC: Negative control, VC: Viability control, SC: Sterility control
SUMBER AYU
TRIPLICATE	3.125	1.563	0.781	0.391	0.195	0.098	0.049	0.024	0.012	0.006	0.003	0.0015
A	0.073	0.077	0.081	0.078	0.076	0.074	0.073	0.411	0.075	0.073	0.075	0.077
B	0.075	0.075	0.076	0.077	0.076	0.074	0.072	0.072	0.317	0.073	0.076	0.072
C	0.067	0.072	0.078	0.076	0.067	0.2	0.075	0.161	0.064	0.065	0.064	0.065
NC	0.043	0.044	0.043	0.043	0.043	0.043	0.042	0.042	0.043	0.043	0.043	0.043
NC	0.043	0.043	0.043	0.043	0.043	0.042	0.043	0.042	0.043	0.042	0.042	0.043
MEAN	0.043	0.0435	0.043	0.043	0.043	0.0425	0.0425	0.042	0.043	0.0425	0.0425	0.043
VC	0.063	0.071	0.061	0.061	0.063	0.292
MEAN	0.0638
SC	0.045	0.047	0.045	0.045	0.045	0.045
MEAN	0.0453333
A,B,C: Sumber Ayu intimate wash, NC: Negative control, VC: Viability control, SC: Sterility control
LACTACYD
TRIPLICATE	3.125	1.563	0.781	0.391	0.195	0.098	0.049	0.024	0.012	0.006	0.003	0.0015
A	0.065	0.077	0.085	0.076	0.073	0.071	0.071	0.072	0.072	0.07	0.069	0.069
B	0.066	0.079	0.083	0.08	0.073	0.074	0.069	0.069	0.075	0.077	0.072	0.07
C	0.067	0.079	0.083	0.08	0.077	0.082	0.083	0.084	0.086	0.089	0.092	0.071
NC	0.048	0.047	0.044	0.044	0.05	0.044	0.044	0.046	0.044	0.045	0.046	0.045
NC	0.043	0.045	0.045	0.044	0.044	0.044	0.045	0.044	0.046	0.046	0.045	0.049
MEAN	0.0455	0.046	0.0445	0.044	0.047	0.044	0.0445	0.045	0.045	0.0455	0.0455	0.047
VC	0.074	0.065	0.08	0.073	0.064	0.069
MEAN	0.0708333
SC	0.062	0.055	0.079	0.071	0.071	0.048
MEAN	0.0643333
A,B,C: Lactacyd intimate wash, NC: Negative control, VC: Viability control, SC: Sterility control
GOOD VIRTUES & CO.
TRIPLICATE	3.125	1.563	0.781	0.391	0.195	0.098	0.049	0.024	0.012	0.006	0.003	0.0015
A	0.088	0.09	0.087	0.09	0.078	0.08	0.083	0.073	0.07	0.071	0.064	0.074
B	0.084	0.089	0.087	0.084	0.081	0.082	0.081	0.079	0.075	0.071	0.073	0.071
C	0.079	0.081	0.08	0.077	0.078	0.073	0.074	0.074	0.073	0.074	0.073	0.071
NC	0.052	0.052	0.043	0.043	0.043	0.042	0.042	0.043	0.043	0.047	0.045	0.044
NC	0.043	0.067	0.044	0.042	0.043	0.048	0.043	0.043	0.046	0.044	0.045	0.043
MEAN	0.0475	0.0595	0.0435	0.0425	0.043	0.045	0.0425	0.043	0.0445	0.0455	0.045	0.0435
VC	0.074	0.076	0.071	0.071	0.079	0.077
MEAN	0.0746667
SC	0.054	0.065	0.065	0.064	0.051	0.045
MEAN	0.0573333
A,B,C: Good Virtues & Co. intimate wash, NC: Negative control, VC: Viability control, SC: Sterility control
