# Supplementary material for: Antimicrobial activity of Andrographis paniculata intimate wash and commercial formulations against vaginal pathogens using the broth microdilution method
Source: PeerJ. 2025 Oct 10;13:e20144. doi: 10.7717/peerj.20144 (PMC12517284; doi:10.7717/peerj.20144)
Supplement: Supplemental Information 2 [file peerj-13-20144-s002.xlsx]

## Sheet: C. albicans
		Intimate Wash		Concentration (mg/ml)
				3.125	1.563	0.781	0.391	0.195	0.098	0.049	0.024	0.012	0.006	0.003	0.0015
				Raw data for percentage of microbial inhibition (%)
		A. paniculata intimate wash	1	123.01	134.7	171.89	80.77	155.03	126.63	105.92	124.85	157.1	100.59	93.79	105.92
			2	67.16	132	200	118.64	161.24	145.27	119.82	134.62	148.52	137.57	136.98	128.4
			3	116	137.6	189.35	112.72	160.65	144.08	119.53	127.51	152.96	120.12	104.73	124.85
		Sebamed	1	43.59	72.76	76.87	51.25	-1.25	-3.91	-2.85	2.67	-4.8	-24.73	3.02	-2.14
			2	54.98	47.15	59.79	34.52	16.55	11.74	12.1	13.7	5.52	13.35	8.72	-6.41
			3	55.69	50.71	56.94	40.21	-31.49	16.01	7.12	9.07	9.07	7.3	13.7	4.63
		Sumber Ayu	1	41.83	17.38	16.49	10.78	3.64	-19.2	-9.39	22.02	-8.32	25.23	20.95	28.27
			2	42.18	19.88	19.34	14.35	11.85	12.56	2.39	3.1	17.74	13.81	10.6	22.91
			3	41.83	19.88	10.77	6.85	8.28	6.85	2.03	-2.25	4.18	10.24	10.96	16.49
		Lactacyd	1	52.13	29.43	23.44	-1.55	-7	-12.64	-8.41	5.14	10.59	14.82	11.83	10.24
			2	56.35	32.95	14.99	17.11	4.96	-0.035	6.37	-0.49	1.44	7.43	6.9	8.13
			3	45.79	27.31	3.73	1.62	13.06	-14.4	-5.6	-4.71	8.13	-4.54	9.71	5.67
		Good Virtue & Co.	1	83.85	94.52	74.72	26.4	7.44	7.16	-16.99	1.12	-9.69	12.78	13.9	-8.29
			2	77.11	66.15	37.36	40.73	34.13	28.51	15.87	22.75	22.05	12.78	13.06	22.05
			3	83.01	56.6	35.39	32.02	32.44	22.61	29.07	27.25	20.37	11.1	13.34	13.34

## Sheet: E. coli
		Intimate Wash		Concentration (mg/ml)
				3.125	1.563	0.781	0.391	0.195	0.098	0.049	0.024	0.012	0.006	0.003	0.0015
				Raw data for percentage of microbial inhibition (%)
		A. paniculata intimate wash	1	91.44	38.52	45.41	34.06	41.22	68.73	104.19	101.22	103.67	50.57	77.29	35.46
			2	89.17	41.57	107.34	92.49	106.46	101.4	102.88	102.18	93.1	64.72	37.55	25.5
			3	94.06	82.34	94.06	104.8	107.77	102.36	106.38	102.18	105.07	100.96	106.38	48.47
		Sebamed	1	53.59	41.65	24.85	22.64	15.07	8.91	10.43	4.7	1.03	1.35	8.21	2
			2	53.27	34.74	22.8	18.21	8.81	10.64	7.4	10.75	11.94	10.32	0.54	2.54
			3	50.35	30.09	20.75	11.51	-1.35	-5.13	-5.02	-2.97	0.7	2.86	-0.06	1.35
		Sumber Ayu	1	42.42	20.65	8.01	3.03	6.99	4.56	-1.85	-4.28	1.84	0	2.52	-2.02
			2	44.46	23.94	9.49	10.85	-1.05	5.8	-2.07	-0.77	7.28	0	3.65	-0.544
			3	43.89	20.88	1.67	1.44	-0.71	-2.47	-0.94	-4.74	-0.2	0	-4.74	-10.75
		Lactacyd	1	43.02	27.44	23.54	7.9	7.03	6.82	20.4	-0.87	0.92	0.76	-1.14	-2.49
			2	44.86	18.67	6.87	8.66	2.49	2.27	2	2.27	-3.73	-4.65	-0.05	-2.81
			3	44.97	18.78	1.68	0.54	-3.57	-1.84	-5.79	-0.43	-9.36	-4.65	-9.47	-6.49
		Good Virtue & Co.	1	41.29	27.62	21.04	17.04	11.73	13.41	8.36	3.1	3.31	-2.79	6.89	12.36
			2	43.19	28.67	8.21	3.26	0.37	0.89	0.47	3.31	-0.05	4.26	2.26	3.1
			3	41.08	25.93	2.95	-1.05	-1.74	-4.37	-7.1	-4.89	-6.68	-5.1	-8.89	-5.31

## Sheet: S. agalactiae
		Intimate Wash		Concentration (mg/ml)
				3.125	1.563	0.781	0.391	0.195	0.098	0.049	0.024	0.012	0.006	0.003	0.0015
				Raw data for percentage of microbial inhibition (%)
		A. paniculata intimate wash	1	129.9	130	129.6	133.2	127.6	130.5	125.4	128.9	128.1	126.5	132.5	130.9
			2	124.4	129.6	130	134.3	128.1	130.9	126.3	129.1	127.3	127.2	132.4	131.3
			3	116	131.1	130.6	134.3	128.1	131.8	126.6	128.6	126.6	127.4	130.8	130.7
		Sebamed	1	96.05	93.99	24.05	17.87	9.45	9.79	9.45	5.5	7.9	1.37	7.04	-1.03
			2	97.42	95.7	30.93	19.24	7.04	2.58	8.08	3.78	5.15	4.47	2.92	2.75
			3	98.45	94.67	33.68	31.27	7.04	6.7	1.55	0.69	3.09	-0.69	9.45	-4.12
		Sumber Ayu	1	88.75	35.94	23.23	10.94	9.58	10.42	4.06	6.56	3.02	4.58	3.54	2.19
			2	91.67	43.02	29.06	15.1	7.71	4.79	2.19	5.73	6.35	8.33	8.96	5.73
			3	89.79	38.44	32.6	16.56	18.96	7.29	5.94	4.48	6.15	2.71	8.75	-4.69
		Lactacyd	1	95.98	91.65	29.48	17.84	17.32	11.24	5.36	1.96	7.84	8.87	0.93	4.85
			2	95.98	92.06	36.49	19.28	15.26	9.59	2.89	-2.16	2.27	5.57	9.79	13.3
			3	96.39	82.78	37.73	26.08	13.2	3.81	5.57	1.55	3.09	6.39	4.43	9.18
		Good Virtue & Co.	1	94.63	38.43	30.89	15.6	7.85	8.68	19.01	7.02	1.34	3.82	-1.14	1.96
			2	74.79	17.15	28.62	17.46	10.54	8.88	10.12	7.23	7.13	6.3	11.26	10.64
			3	94.21	29.75	34.4	25.31	14.26	6.4	9.92	3.1	2.79	6.1	15.6	3.62

## Sheet: L. crispatus
		Intimate Wash		Concentration (mg/ml)
				3.125	1.563	0.781	0.391	0.195	0.098	0.049	0.024	0.012	0.006	0.003	0.0015
				Raw data for percentage of microbial inhibition (%)
		A. paniculata intimate wash	1	-137.04	70.37	159.26	185.19	103.7	81.48	37.04	174.07	59.26	200	74.07	88.89
			2	40.74	114.81	214.81	81.48	103.7	85.19	51.85	100	-44.44	85.19	66.67	140.74
		Sebamed	1	9.52	-4.76	-23.81	-38.1	-45.24	-35.71	-33.33	-28.57	-23.81	1.76	-14.29	-33.33
			2	9.52	-4.76	-23.81	-42.86	-50	-59.52	-38.1	-42.86	-47.62	-38.1	-28.57	-4.76
		Sumber Ayu	1	-57.89	-76.32	-73.68	-76.32	-73.68	-65.79	-60.53	-57.89	-65.79	-60.53	-71.05	-76.32
			2	-68.42	-65.79	-84.21	-73.68	-73.68	-65.79	-55.26	-526.32	-10.53	-60.53	-76.32	-50
		Lactacyd	1	-178.57	-371.43	-450	-414.29	-271.43	-285.71	-278.57	-285.71	-285.71	-250	-235.71	-214.29
			2	-192.86	-371.43	-450	-414.29	-271.43	-328.57	-250	-242.86	-328.57	-350	-278.57	-228.57
		Good Virtue & Co.	1	-102.78	-69.44	-141.67	-163.89	-94.44	-94.44	-125	-66.67	-41.67	-41.67	-55.56	-52.78
			2	-75	-63.89	-141.67	-130.56	-94.44	-105.56	-113.89	-72.22	-58.33	-41.67	-55.56	-52.78

## Sheet: Descriptive statistics
	Pathogens/ Microbiota	Variable (Wash)	Concentration
			3.125	1.563	0.781	0.391	0.195	0.098	0.049	0.024	0.012	0.006	0.003	0.0015
			Percentage of Microbial Inhibition (Mean ± Standard Deviation)
	C. albicans	A. paniculata intimate wash	102.06 ± 30.42	134.77 ± 2.80	187.08 ± 14.19	104.04 ± 20.37	158.97 ± 3.43	138.66 ± 10.44	115.09 ± 7.94	128.99 ± 5.05	152.86 ± 4.29	119.43 ± 18.50	111.83 ± 22.45	119.72 ± 12.09
		SebaMed	51.42 ± 6.79	56.87 ± 13.87	64.53 ± 10.78	41.99 ± 8.51	-5.40 ± 24.28	7.95 ± 10.49	5.46 ± 7.61	8.48 ± 5.54	3.26 ± 7.21	-1.36 ± 20.46	8.48 ± 5.34	-1.31 ± 5.57
		Sumber Ayu	41.95 ± 0.20	19.05 ± 1.44	15.53 ± 4.36	10.66 ± 3.75	7.92 ± 4.12	0.07 ± 16.93	-1.66 ± 6.70	7.62 ± 12.75	4.53 ± 13.03	16.43 ± 7.83	14.17 ± 5.87	22.56 ± 5.90
		Lactacyd	51.42 ± 5.32	29.90 ± 2.84	14.05 ± 9.89	5.73 ± 9.98	3.67 ± 10.09	-9.03 ± 7.84	-2.55 ± 7.85	-0.02 ± 4.94	6.72 ± 4.74	5.90 ± 9.77	9.48 ± 2.47	8.01 ± 2.29
		Good Virtues & Co.	81.32 ± 3.67	72.42 ± 19.72	49.16 ± 22.16	33.05 ± 7.22	24.67 ± 14.95	19.43 ± 11.03	9.32 ± 23.72	17.04 ± 13.97	10.91 ± 17.86	12.22 ± 0.97	13.43 ± 0.43	9.03 ± 15.62
	E. coli	A. paniculata intimate wash	91.56 ± 2.45	54.14 ± 24.47	82.27 ± 32.60	77.12 ± 37.79	85.15 ± 38.05	90.83 ± 19.15	104.48 ± 1.77	101.86 ± 0.55	100.61 ± 6.54	72.08 ± 25.99	73.74 ± 34.55	36.48 ± 11.52
		SebaMed	52.40 ± 1.79	35.49 ± 5.82	22.80 ± 2.05	17.45 ± 5.60	7.51 ± 8.29	4.81 ± 8.65	4.27 ± 8.19	4.16 ± 6.88	4.56 ± 6.40	4.84 ± 4.80	2.90 ± 4.61	1.96 ± 0.60
		Sumber Ayu	43.59 ± 1.05	21.82 ± 1.84	6.39 ± 4.15	5.11 ± 5.04	1.74 ± 4.55	2.63 ± 4.46	-1.62 ± 0.60	-3.26 ± 2.17	2.97 ± 3.87	0.00 ± 0.00	0.48 ± 4.55	-4.44 ± 5.52
		Lactacyd	44.28 ± 1.10	21.63 ± 5.03	10.70 ± 11.42	5.70 ± 4.48	1.98 ± 5.32	2.42 ± 4.33	5.54 ± 13.45	0.32 ± 1.70	-4.06 ± 5.15	-2.85 ± 3.12	-3.53 ± 5.15	-3.93 ± 2.22
		Good Virtues & Co.	41.85 ± 1.16	27.41 ± 1.38	10.73 ± 9.31	6.42 ± 9.45	3.45 ± 7.25	3.31 ± 9.13	0.58 ± 7.73	0.51 ± 4.67	-1.14 ± 5.08	-1.21 ± 4.88	0.09 ± 8.11	3.38 ± 8.84
	S. agalactiae	A. paniculata intimate wash	123.43 ± 7.00	130.23 ± 0.78	130.07 ± 0.50	133.93 ± 0.64	127.93 ± 0.29	131.07 ± 0.67	126.10 ± 0.62	128.87 ± 0.25	127.33 ± 0.75	127.03 ± 0.47	131.90 ± 0.95	130.97 ± 0.31
		SebaMed	97.31 ± 1.20	94.79 ± 0.86	29.55 ± 4.96	22.79 ± 7.37	7.84 ± 1.39	6.36 ± 3.62	6.36 ± 4.22	3.32 ± 2.44	5.38 ± 2.41	1.72 ± 2.60	6.47 ± 3.30	-0.80 ± 3.44
		Sumber Ayu	90.07 ± 1.48	39.13 ± 3.59	28.30 ± 4.73	14.20 ± 2.92	12.08 ± 6.03	7.50 ± 2.82	4.06 ± 1.88	5.59 ± 1.05	5.17 ± 1.87	5.21 ± 2.86	7.08 ± 3.07	1.08 ± 5.30
		Lactacyd	96.12 ± 0.24	88.83 ± 5.24	34.57 ± 4.45	21.07 ± 4.40	15.26 ± 2.06	8.21 ± 3.90	4.61 ± 1.49	0.45 ± 2.27	4.40 ± 3.01	6.94 ± 1.72	5.05 ± 4.46	9.11 ± 4.23
		Good Virtues & Co.	87.88 ± 11.34	28.44 ± 10.70	31.30 ± 2.91	19.46 ± 5.15	10.88 ± 3.22	7.99 ± 1.38	13.02 ± 5.19	5.78 ± 2.33	3.75 ± 3.01	5.41 ± 1.38	8.57 ± 8.69	5.41 ± 4.61
	L. crispatus	A. paniculata intimate wash	-48.15 ± 125.71	92.59 ± 31.42	187.04 ± 39.28	133.34 ± 73.33	103.70 ± 0.00	83.34 ± 2.62	44.45 ± 10.47	137.04 ± 52.38	7.41 ± 73.33	142.60 ± 81.18	70.37 ± 5.23	114.82 ± 36.66
		SebaMed	9.52 ± 0.00	-4.76 ± 0.00	-23.81 ± 0.00	-40.48 ± 3.37	-47.62 ± 3.37	-47.62 ± 16.84	-35.72 ± 3.37	-35.72 ± 10.10	-35.72 ± 16.84	-18.17 ± 28.19	-21.43 ± 10.10	-19.05 ± 20.20
		Sumber Ayu	-63.16 ± 7.45	-71.06 ± 7.45	-78.95 ± 7.45	-75.00 ± 1.87	-73.68 ± 0.00	-65.79 ± 0.00	-57.90 ± 3.73	-292.11 ± 331.23	-38.16 ± 39.07	-60.53 ± 0.00	-73.69 ± 3.73	-63.16 ± 18.61
		Lactacyd	-185.72 ± 10.10	-371.43 ± 0.00	-450.00 ± 0.00	-414.29 ± 0.00	-271.43 ± 0.00	-307.14 ± 30.31	-264.29 ± 20.20	-264.29 ± 30.30	-307.14 ± 30.31	-300.00 ± 70.71	-257.14 ± 30.31	-221.43 ± 10.10
		Good Virtues & Co.	-88.89 ± 19.64	-66.67 ± 3.92	-141.67 ± 0.00	-147.23 ± 23.57	-94.44 ± 0.00	-100.00 ± 7.86	-119.45 ± 7.86	-69.45 ± 3.92	-50.00 ± 11.78	-41.67 ± 0.00	-55.56 ± 0.00	-52.78 ± 0.00

## Sheet: Result pairwise comparisons
	Pathogens/ Microbiota	(I) Wash	(J) Wash	Mean difference (I-J)	Std. error	p-value	95% confidence interval for difference
							Lower bound	Upper bound
	C. albicans	A. paniculata intimate wash	SebaMed	111.094*	3.452	<0.001	98.729	123.458
			Sumber Ayu	117.889*	3.452	<0.001	105.525	130.254
			Lactacyd	120.851*	3.452	<0.001	108.486	133.215
			Good Virtues & Co.	101.792*	3.452	<0.001	89.428	114.156
		SebaMed	A. paniculata intimate wash	-111.094*	3.452	<0.001	-123.458	-98.729
			Sumber Ayu	6.796	3.452	0.773	-5.568	19.16
			Lactacyd	9.757	3.452	0.18	-2.607	22.121
			Good Virtues & Co.	-9.302	3.452	0.225	-21.666	3.063
		Sumber Ayu	A. paniculata intimate wash	-117.889*	3.452	<0.001	-130.254	-105.525
			SebaMed	-6.796	3.452	0.773	-19.16	5.568
			Lactacyd	2.961	3.452	1	-9.403	15.325
			Good Virtues & Co.	-16.097*	3.452	0.009	-28.462	-3.733
		Lactacyd	A. paniculata intimate wash	-120.851*	3.452	<0.001	-133.215	-108.466
			SebaMed	-9.757	3.452	0.18	-22.121	2.607
			Sumber Ayu	-2.961	3.452	1	-15.325	9.403
			Good Virtues & Co.	-19.059*	3.452	0.003	-31.423	-6.695
		Good Virtues & Co.	A. paniculata intimate wash	101.792*	3.452	<0.001	-114.156	-89.428
			SebaMed	9.302	3.452	0.225	-3.063	21.666
			Sumber Ayu	16.097*	3.452	0.009	3.733	28.462
			Lactacyd	19.059*	3.452	0.003	6.695	31.423
	E. coli	A. paniculata intimate wash	SebaMed	67.264*	6.406	<0.001	44.321	90.207
			Sumber Ayu	74.576*	6.406	<0.001	51.633	97.519
			Lactacyd	74.345*	6.406	<0.001	51.402	97.288
			Good Virtues & Co.	72.912*	6.406	<0.001	49.969	95.855
		SebaMed	A. paniculata intimate wash	-67.264*	6.406	<0.001	-90.207	-44.321
			Sumber Ayu	7.312	6.406	1	-15.631	30.255
			Lactacyd	7.081	6.406	1	-15.862	30.024
			Good Virtues & Co.	5.648	6.406	1	-17.295	28.591
		Sumber Ayu	A. paniculata intimate wash	-74.576*	6.406	<0.001	-97.519	-51.633
			SebaMed	-7.312	6.406	1	-30.255	15.631
			Lactacyd	-0.231	6.406	1	-23.174	22.712
			Good Virtues & Co.	-1.664	6.406	1	-24.607	21.279
		Lactacyd	A. paniculata intimate wash	-74.345*	6.406	<0.001	-97.288	-51.402
			SebaMed	-7.081	6.406	1	-30.024	15.862
			Sumber Ayu	0.231	6.406	1	-22.712	23.174
			Good Virtues & Co.	-1.433	6.406	1	-24.376	21.51
		Good Virtues & Co.	A. paniculata intimate wash	-72.912*	6.406	<0.001	-95.855	-49.969
			SebaMed	-5.648	6.406	1	-28.591	17.295
			Sumber Ayu	1.664	6.406	1	-21.279	24.607
			Lactacyd	1.433	6.406	1	-21.51	24.376
	S. agalactiae	A. paniculata intimate wash	SebaMed	105.648*	0.733	<0.001	103.024	108.272
			Sumber Ayu	110.783*	0.733	<0.001	108.159	113.406
			Lactacyd	104.521*	0.733	<0.001	101.897	107.145
			Good Virtues & Co.	110.081*	0.733	<0.001	107.458	112.705
		SebaMed	A. paniculata intimate wash	-105.648*	0.733	<0.001	-108.272	-103.024
			Sumber Ayu	5.134*	0.733	<0.001	2.511	7.758
			Lactacyd	-1.127	0.733	1	-3.751	1.497
			Good Virtues & Co.	4.433*	0.733	0.001	1.81	7.057
		Sumber Ayu	A. paniculata intimate wash	-110.783*	0.733	<0.001	-113.406	-108.159
			SebaMed	-5.134*	0.733	<0.001	-7.758	-2.511
			Lactacyd	-6.261*	0.733	<0.001	-8.885	-3.638
			Good Virtues & Co.	-0.701	0.733	1	-3.325	1.923
		Lactacyd	A. paniculata intimate wash	-104.521*	0.733	<0.001	-107.145	-101.897
			SebaMed	1.127	0.733		-1.497	3.751
			Sumber Ayu	6.261*	0.733	<0.001	3.638	8.885
			Good Virtues & Co.	5.560*	0.733	<0.001	2.937	8.184
		Good Virtues & Co.	A. paniculata intimate wash	-110.081*	0.733	<0.001	-112.705	-107.458
			SebaMed	-4.433*	0.733	0.001	-7.057	-1.81
			Sumber Ayu	0.701	0.733	1	-1.923	3.325
			Lactacyd	-5.560*	0.733	<0.001	-8.184	-2.937
	L. crispatus	A. paniculata intimate wash	SebaMed	115.756*	11.953	0.002	58.701	172.811
			Sumber Ayu	173.473*	11.953	<0.001	116.418	230.528
			Lactacyd	390.233*	11.953	<0.001	333.178	447.288
			Good Virtues & Co.	174.692*	11.953	<0.001	117.637	231.747
		SebaMed	A. paniculata intimate wash	-115.756*	11.953	0.002	-172.811	-58.701
			Sumber Ayu	57.717*	11.953	0.048	0.662	114.772
			Lactacyd	274.477*	11.953	<0.001	217.423	331.532
			Good Virtues & Co.	58.936*	11.953	0.044	1.881	115.991
		Sumber Ayu	A. paniculata intimate wash	-173.473*	11.953	<0.001	-230.528	-116.418
			SebaMed	-57.717*	11.953	0.048	-114.772	-0.662
			Lactacyd	216.760*	11.953	<0.001	159.705	273.815
			Good Virtues & Co.	1.219	11.953	1	-55.836	58.274
		Lactacyd	A. paniculata intimate wash	-390.233*	11.953	<0.001	-447.288	-333.178
			SebaMed	-274.477*	11.953	<0.001	-331.532	-217.423
			Sumber Ayu	-216.760*	11.953	<0.001	-273.815	-159.705
			Good Virtues & Co.	-215.541*	11.953	<0.001	-272.596	-158.486
		Good Virtues & Co.	A. paniculata intimate wash	-174.692*	11.953	<0.001	-231.747	-117.637
			SebaMed	-58.936*	11.953	0.044	-115.991	-1.881
			Sumber Ayu	-1.219	11.953	1	-58.274	55.836
			Lactacyd	215.541*	11.953	<0.001	158.486	272.596
